# Supplementary material
Source: Springer Nature journal article supplement (https://www.springermedizin.de/resource/supplementary/12958_2011_976_MOESM9_ESM.pdf/9566546)

*cyp19a1a* sex  
dimorphic expression

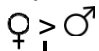

*amh* sex dimorphic  
expression

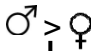

*amh*, *cyp19a1a*, *dax1* up-regulation  
*shp* down-regulation

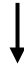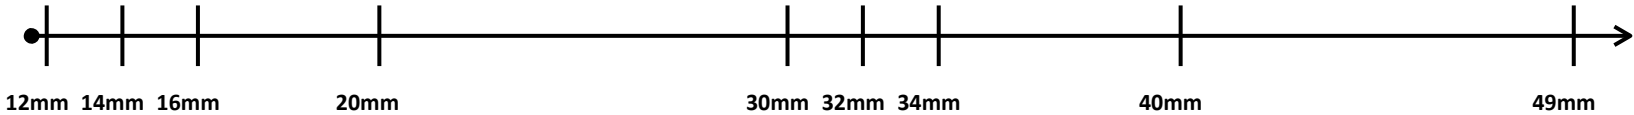

Ovarian cavity formation

Testis differentiation

Sex dimorphic difference in  
GC number and gonad size

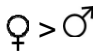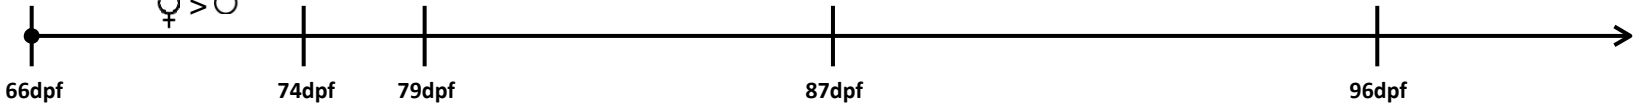

Supplement: MOESM9 [file 9566546]
